# Supplementary material for: Node Interference and Robustness: Performing Virtual Knock-Out Experiments on Biological Networks: The Case of Leukocyte Integrin Activation Network
Source: PLOS journal article supplement (doi:10.1371/journal.pone.0088938), 2014-02-20
Supplement: S4 (10.1371/journal.pone.0088938.s004) [file journal.pone.0088938.s004]

## 1 Suppl. File S2: centralities robustness, dependence and competition value

Given a network  $G = (N, E)$  a centrality measure  $C$  and a node  $n \in N$ , we define the centrality robustness of node  $n$  as follow:

$$Rob_C(n, G) = \frac{1}{\max_{i \in N_{|n}} \{|Int_C(i, n, G)|\}}$$

Notice that we consider absolute value of interference. To consider only the positive interference we define positive robustness value as:

$$PosRob_C(n, G) = \frac{1}{\max_{i \in N_{|n}} \{Int_C(i, n, G)\}}$$

where

$$Int_C(i, n, G) \geq 0$$

To consider only the negative interference we define negative robustness as

$$NegRob_C(n, G) = \frac{1}{\max_{i \in N_{|n}} \{|Int_C(i, n, G)|\}}$$

where

$$Int_C(i, n, G) \leq 0$$

In some cases it is more intuitive to use the reciprocal of negative and positive robustness. We define the reciprocal of positive robustness as the *dependence value*:

$$Dep_C(n, G) = \max_{i \in N_{|n}} \{Int_C(i, n, G)\}$$

where

$$Int_C(i, n, G) \geq 0$$

We define the *competition value* as the reciprocal of negative robustness:

$$Comp_C(n, G) = \max_{i \in N_{|n}} \{|Int_C(i, n, G)|\}$$

where

$$Int_C(i, n, G) \leq 0$$

*relative robustness*, *relative dependence* and *relative competition* are defined as the fraction of the variation of the centrality value with respect to the starting centrality value. Given the centrality  $C$  and a node  $n$  the relative centrality value in the network  $G$  is defined as:

$$relC(n, G) = \frac{C(n, G)}{\sum_{i \in N} Int_C(i, G)}$$

The relative robustness is

$$relRob_C(n, G) = \frac{relC(n, G)}{\max_{i \in N_{|n}} \{|Int_C(i, n, G)|\}}$$

Similarly for dependence value:

$$relDep_C(n, G) = \frac{Dep_C(n, G)}{relC(n, G)}$$

and competition value:

$$relComp_C(n, G) = \frac{Comp_C(n, G)}{relC(n, G)}$$

Total robustness dependence and competition value can be used in order to characterize the entire network. Total robustness of a node  $n$  with respect to the centrality  $C$  in the network  $G$  is:

$$TotRob_C(n, G) = \frac{1}{\sum_{i \in N_{|n}} Int_C(i, n, G)}$$

Similarly are defined the total dependence value:

$$TotDep_C(n, G) = \sum_{i \in N_{|n}} Int_C(i, n, G)$$

where

$$Int_C(i, n, G) \geq 0$$

and the total competition value:

$$TotComp_C(n, G) = \sum_{i \in N_{|n}} |Int_C(i, n, G)|$$

where

$$Int_C(i, n, G) \leq 0$$
